# Supplementary material
Source: MDPI journal article supplement (https://www.mdpi.com/2673-527X/2/3/12)
Supplement: s1 [file s1]

# Semplicemente RESPIMAT®

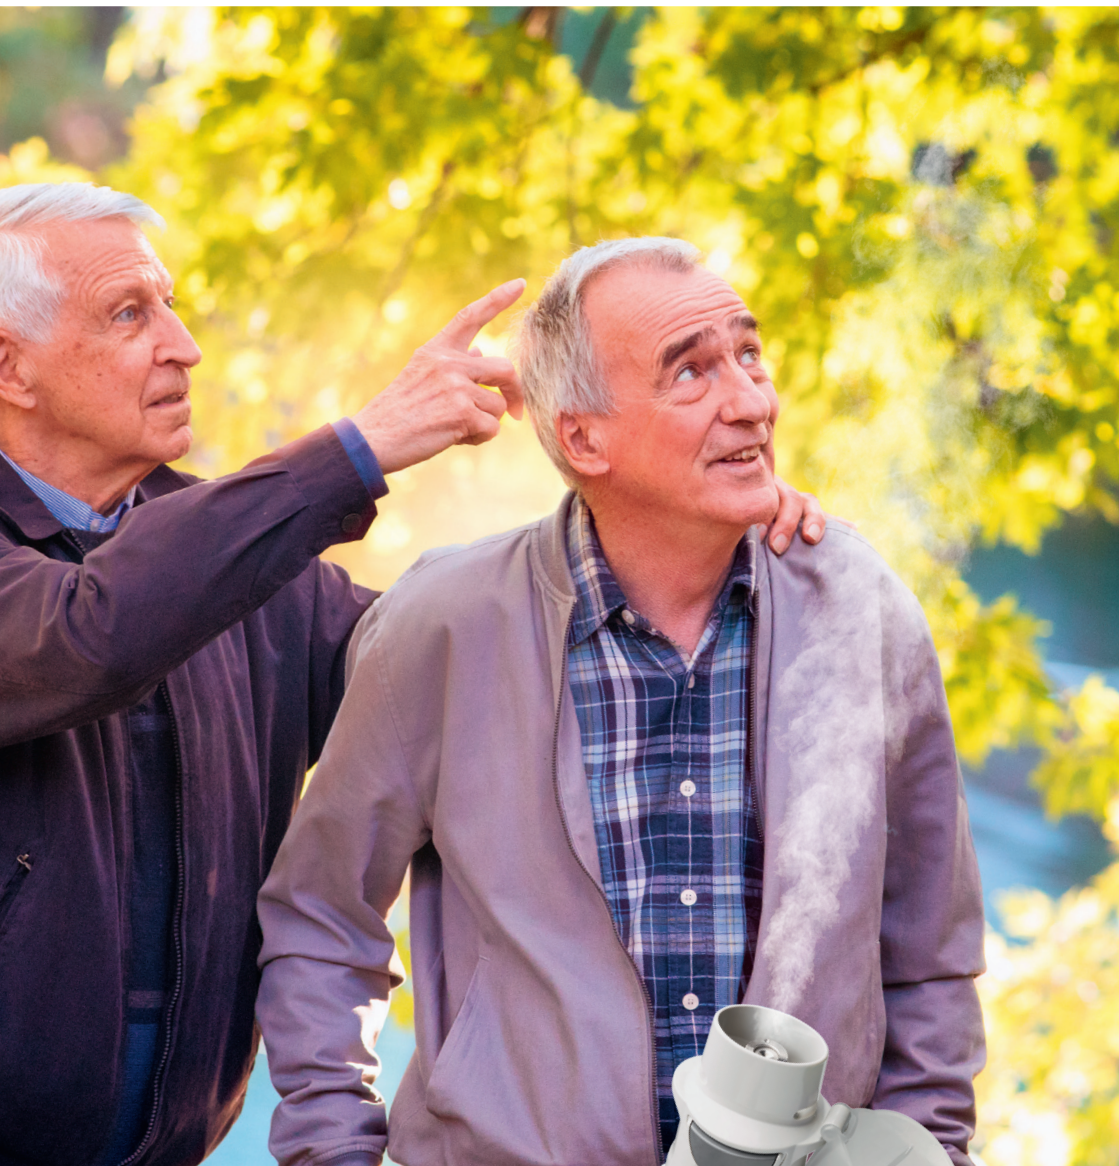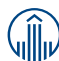

**Boehringer  
Ingelheim**

Boehringer Ingelheim (Schweiz) GmbH  
Hochbergerstrasse 60B, 4002 Basilea

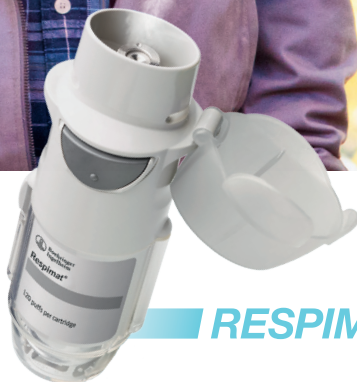

**RESPIMAT®**

# COME USARE BENE IL DISPOSITIVO RESPIMAT® – Punti chiave da ricordare

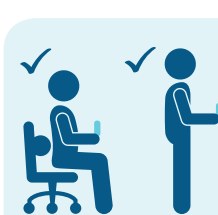

**Prima di cominciare**

- impiegare il tempo sufficiente per la corretta applicazione del medicamento
- assumere la posizione eretta o seduta
- verificare il numero di dosi rimanenti
- chiudere il cappuccio





**1** Ruotare la base trasparente di mezzo giro, fino a percepire un clic.



**2** Controllare che la cartuccia sia in posizione 2.

posizione 1      posizione 2



**3** Aprire completamente il cappuccio.



**4** Espirare a fondo al di fuori del bocaglio.

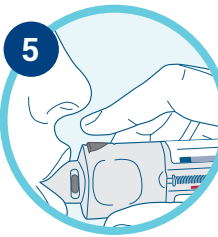

**5** Serrare le labbra attorno al bocaglio, senza coprire le 2 aperture, mantenendo RESPIMAT® orizzontalmente.



**6** «clic!»  
Avviare una lenta inspirazione e premere il pulsante. Continuare a inspirare a fondo e poi trattenere il respiro per 5–10 secondi.

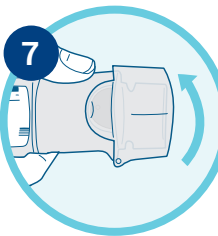

**7** Richiudere il cappuccio e controllare che la cartuccia sia in posizione 1 (figura 2).

**8** **Ripetere i punti da 1 a 7**  
(2 spruzzi 1 volta al giorno).

Pulire il bocaglio almeno una volta la settimana. Utilizzare solo un panno o un fazzolettino di carta inumidito. Tenere RESPIMAT® in un luogo asciutto e a temperatura ambiente.

# ANNOTARE LE APPLICAZIONI FINO ALL'APPUNTAMENTO SUCCESSIVO



**1ª settimana**

**Lunedì**  
Data: 22.8.  
Ora: 9.00

Per seguire meglio il trattamento, annotare le inalazioni nella tabella sottostante. Per il successo del trattamento, è importante ripetere alla stessa ora l'**applicazione di 2 spruzzi**. Ricordarsi di mostrare la tabella al medico in occasione del successivo appuntamento.

| 1ª settimana |             |             |             |             |             |             |
|--------------|-------------|-------------|-------------|-------------|-------------|-------------|
| Lunedì       | Martedì     | Mercoledì   | Giovedì     | Venerdì     | Sabato      | Domenica    |
| Data: _____  | Data: _____ | Data: _____ | Data: _____ | Data: _____ | Data: _____ | Data: _____ |
| Ora: _____   | Ora: _____  | Ora: _____  | Ora: _____  | Ora: _____  | Ora: _____  | Ora: _____  |
| 2ª settimana |             |             |             |             |             |             |
| Lunedì       | Martedì     | Mercoledì   | Giovedì     | Venerdì     | Sabato      | Domenica    |
| Data: _____  | Data: _____ | Data: _____ | Data: _____ | Data: _____ | Data: _____ | Data: _____ |
| Ora: _____   | Ora: _____  | Ora: _____  | Ora: _____  | Ora: _____  | Ora: _____  | Ora: _____  |
| 3ª settimana |             |             |             |             |             |             |
| Lunedì       | Martedì     | Mercoledì   | Giovedì     | Venerdì     | Sabato      | Domenica    |
| Data: _____  | Data: _____ | Data: _____ | Data: _____ | Data: _____ | Data: _____ | Data: _____ |
| Ora: _____   | Ora: _____  | Ora: _____  | Ora: _____  | Ora: _____  | Ora: _____  | Ora: _____  |

Preparare le domande per la visita successiva.

Timbro del medico

# PREPARAZIONE DEL DISPOSITIVO PRIMA DEL PRIMO USO

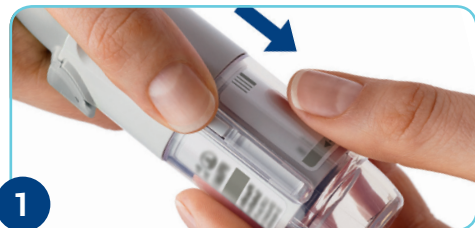

1

**Premere il nottolino di sicurezza** durante la rimozione della base trasparente con l'altra mano.

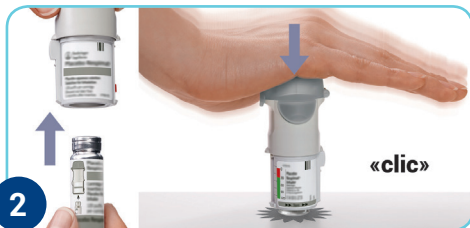

2

**Inserire la cartuccia** completamente, fino a percepire un clic.

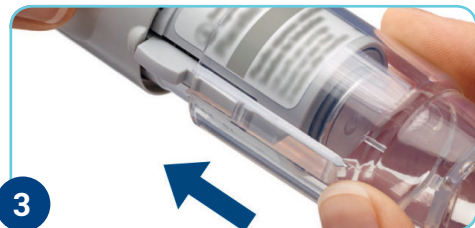

3

**Chiusura.** Rimettere la base trasparente, fino a percepire un clic.

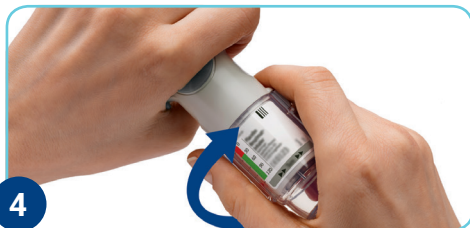

4

**Avviamento.** Ruotare la base di mezzo giro, fino a percepire un clic.

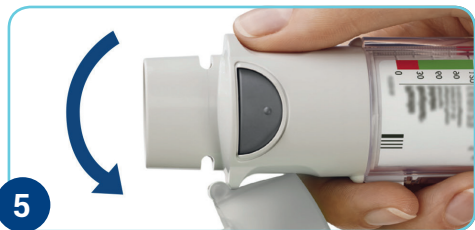

5

**Aprire completamente il cappuccio.**

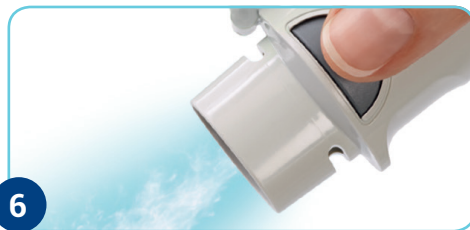

6

**Attivazione.** Orientare l'inalatore RESPIMAT® verso il pavimento e quindi premere il pulsante per rilasciare la dose.

**7** **Chiudere il cappuccio e ripetere i punti 4-6,** fino a vaporizzare una nube visibile. Dopo la vaporizzazione di una nube visibile, ripetere i punti 4-6 per tre volte.

Se necessario, è possibile chiedere aiuto al farmacista o al proprio medico per la preparazione del dispositivo RESPIMAT®.
